# Supplementary material for: 3D printing of multicolor luminescent glass
Source: Royal Society of Chemistry journal article supplement (doi:10.1039/c8ra06706f), 2018-01-01
Supplement: c8ra06706f1.pdf [file c8ra06706f1.pdf]

## Supplementary Information

The temperature curves used in the debinding and sintering processes.

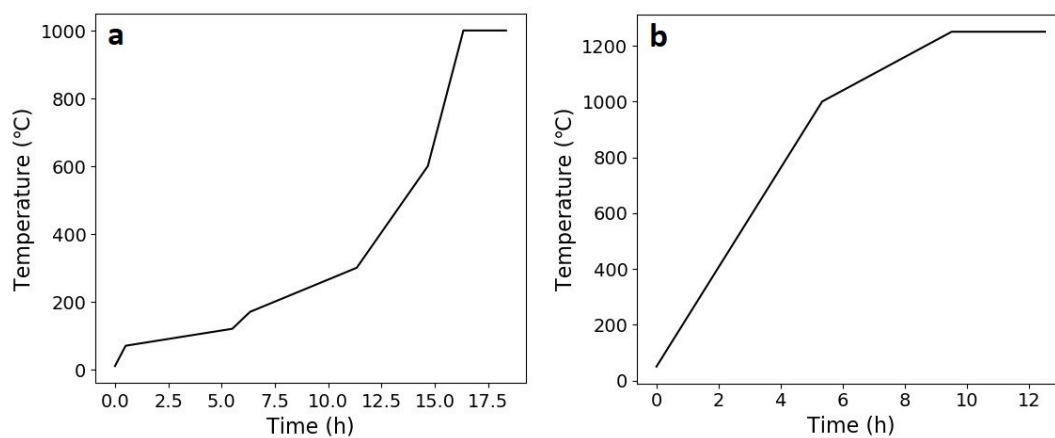

**Fig. S1** (a) The temperature curve for debinding to obtain the porous glass (b) The temperature curve for sintering the porous silica glass
